# Supplementary material for: The influence of irradiance and interspecific differences on δ 11 B, δ 13 C and elemental ratios in four coralline algae complexes
Source: Copernicus journal article supplement (doi:10.5194/egusphere-2025-2626), 2025-07-03
Supplement: Supplementary file 1 [file Tables paper CCA 05272025.xlsx]

## Sheet: Table S1
Table S1: Geochemical and physiological data.
											GEOCHEMICAL PARAMETERS													PHYSIOLOGICAL PARAMETERS
Label	Species	Morphology		Irradiance	δ13Cinorganic (‰)	δ13Corganic (‰)	δ11B (‰)	δ18O (‰)	Li/Ca (µmol/mol)	B/Ca (µmol/mol)	Mg/Ca (mmol/mol)	Sr/Ca (mmol/mol)	Ba/Ca (µmol/mol)	U/Ca (nmol/mol)	Mn/Ca (µmol/mol)	Fe/Ca (mmol/mol)	Li/Mg (µmol/mmol)		Calcification mgCaCO3_cm-2_d-1	Net_PS ugO2_cm-2_h-1	Fv_Fm	Dark_respiration_ugO2_cm-2_h-1	Dark_calc_ugCaCO3_cm-2_h-1	Light_calc_ugCaCO3_cm-2_h-1	Chl_a mg_g-1	PC_ug_g-1	PE_ug_g-1	ETRmax	FWHM
Arthrocardia	Corallina/Arthrocardia "robust "	Geniculate		0.6	-4.67		27.13	-1.84	57	484	260	3.2	5.9	215	15	0.2	0.22		-0.01	25.95	0.6	-15.24	-77.26	-0.86				16.77	0.99
Arthrocardia	Corallina/Arthrocardia "robust "	Geniculate		0.6	-4.95	-20.35	24.95	-1.43	54	552	230	3.3	9.2	277	68	2.2	0.23		-0.03	7.36	0.65	-18.43	-53.21	1.53				5.73	0.49
Arthrocardia	Corallina/Arthrocardia "robust "	Geniculate		0.6	-7.75		26.75	-2.4	72	438	250	3	16	178	129	0.3	0.29		-0.07		0.71				0.37	0.21	0.18
Arthrocardia	Corallina/Arthrocardia "robust "	Geniculate		0.6	-6.1		29.12	-1.46	60	494	216	3.1	10.5	291	44	1.1	0.28		-0.12		0.69				0.23	0.08	0.22
Arthrocardia	Corallina/Arthrocardia "robust "	Geniculate		0.6	-4.18	-19.02	27.13	-1.42	53	495	260	3	13.7	232	20	0.1	0.2		-0.04		0.65				0.26	0.11	0.29		0.61
Arthrocardia	Corallina/Arthrocardia "robust "	Geniculate		1.2	-5.07		26.24	-1.38	50	533	222	3.1	9	181	11	0.3	0.23		0.38		0.67				0.48	0.2	1.04		0.62
Arthrocardia	Corallina/Arthrocardia "robust "	Geniculate		1.2		-20.13	21.51	0.8	254	290	68	8.4	23.9	266	194	2.8	3.74		0.02	3.62	0.66			-54.88	0.31	0.12	0.4	16.49	0.34
Arthrocardia	Corallina/Arthrocardia "robust "	Geniculate		1.2	-4.77	-20.45	25.97	-1.06	239	505	215	3.3	22.3	262	362	6.6	1.11		-0.03		0.66				0.4	0.18	0.76
Arthrocardia	Corallina/Arthrocardia "robust "	Geniculate		1.2	-5.11	-16.97	25.81	-1.66		493	263	3.1	17.5	202	146	3.7			-0.05	35.36	0.67			-5.29				18.55	0.58
Arthrocardia	Corallina/Arthrocardia "robust "	Geniculate		1.2	-6.68		25.44	-1.4	108	462	232	3.1	10.4	304	162	3.9	0.465517		-0.05		0.68				0.39	0.2	0.75	15.22	0.63
Arthrocardia	Corallina/Arthrocardia "robust "	Geniculate		1.8	-5.61		26.99	-1.42	63	563	232	3.1	15.6	228	40	1.1	0.271552		-0.09	24.29	0.67			-32.31					0.52
Arthrocardia	Corallina/Arthrocardia "robust "	Geniculate		1.8	-7.46			-2.09	366	645	316	3	37.1	424	230	13.1	1.15823		-0.15		0.67				0.38	0.41	0.28		0.7
Arthrocardia	Corallina/Arthrocardia "robust "	Geniculate		1.8	-6.16		27.41	-1.82	54	486	236	3.2	12.2	216	26	0.4	0.228814		-0.02		0.68				0.32	0.42	0.06		0.63
Arthrocardia	Corallina/Arthrocardia "robust "	Geniculate		1.8	-5.84		26.19	-1.54	147	623	272	3.1	18.5	308	115	2	0.540441		0.01	-6.34	0.71			1.14				29.08
Arthrocardia	Corallina/Arthrocardia "robust "	Geniculate		1.8	-5.36		27.08	-1.65	56	528	256	3.2	20	168	20	0.1	0.21875		0.01		0.68				0.43	0.34	0.39		0.75
Arthrocardia	Corallina/Arthrocardia "robust "	Geniculate		2.3	-4.76	-18.4	26.48	-1.34	80	608	243	3.3	9.4	297	54	1.8	0.329218		0.02	27.23	0.64	-19.3	-0.07	3.26				25.24
Arthrocardia	Corallina/Arthrocardia "robust "	Geniculate		2.3	-4.49		26.86	-1.54	60	535	252	3.5	6.3	285	15	0.4	0.238095		0.06	35.07	0.66	-8.63	-47.16	-2.52				20.16
Arthrocardia	Corallina/Arthrocardia "robust "	Geniculate		2.3	-5.78	-19.76	28.92	-1.35	48	511	240	3	10	258	30	0.1	0.2		0.12		0.71				0.38	0.19	0.69
Arthrocardia	Corallina/Arthrocardia "robust "	Geniculate		2.3	-5.31	-16.73	25.28	-1.29	103	535	248	3.1	9.2	188	129	0.9	0.415323		0.04		0.59				0.44	0.09	0.45		0.34
Arthrocardia	Corallina/Arthrocardia "robust "	Geniculate		2.3	-6.3	-18.71	27.12	-1.63	186	525	250	3.7	12.3	426	183	9.4	0.744		0	38.09	0.68	-16.46	-104.65	41.99					0.58
Corallina	Corallina/Arthrocardia "fine"	Geniculate		0.6	-5.91	-16.79	27.96	-1.77	42	470	222	3	5.5	275	78	0.9	0.19			-5.89	0.67	-4.23	-1.83	7.26				5.48	0.53
Corallina	Corallina/Arthrocardia "fine"	Geniculate		0.6	-3.53	-19.39	27.46	-1.05	54	522	205	2.9	7.6	181	25	0.4	0.26		0.05	2.93	0.69	-18.72	0.58	3.3				26.77	0.39
Corallina	Corallina/Arthrocardia "fine"	Geniculate		0.6	-5.81		28.27	-1.61	66	541	224	3	25	261	113	1.5	0.29		0.01	7	0.64	-24.44		9.78				13.43	0.32
Corallina	Corallina/Arthrocardia "fine"	Geniculate		0.6	-5.53		28.08	-1.65	54	569	260	3	10	204	23	0.5	0.2		0		0.67					0.13	0.43
Corallina	Corallina/Arthrocardia "fine"	Geniculate		0.6	-5.84	-16.32	28.4	-1.86	46	486	234	3.1	5.7	281	45	0.9	0.19			11.79	0.67			-46.43				8.47
Corallina	Corallina/Arthrocardia "fine"	Geniculate		1.2	-6.88		26.19	-1.75	53	577	251	3.4	12.9	290	20	0.4	0.21		0	-12.89	0.66			-6.34				9.22	0.22
Corallina	Corallina/Arthrocardia "fine"	Geniculate		1.2	-6.78	-18.19	25.06	-1.11	82	556	244	3.2	26.8	281	97	2.5	0.34		0.12	63.86	0.67			-48.41				12.94
Corallina	Corallina/Arthrocardia "fine"	Geniculate		1.2	-5.09		27.64	-1.67	74	505	220	3	9.4	270	90	2.8	0.33		0.07		0.07						0.03
Corallina	Corallina/Arthrocardia "fine"	Geniculate		1.2	-5.59		26.72	-1.05		444		2.9	9.7	235	33	0.8			0.07		0.73				0.51	0.17	0.33
Corallina	Corallina/Arthrocardia "fine"	Geniculate		1.2	-5.64		27.27	-1.45	68	553	247	3.2	8.6	288	40	1.2	0.28		0.05		0.69				0.41	0.18	0.35		0.15
Corallina	Corallina/Arthrocardia "fine"	Geniculate		1.8	-5.13		28.04	-1.57	54	485	244	3.1	8.8	243	25	0.6	0.22		0.03		0.67				0.47	0.23	0.13		0.28
Corallina	Corallina/Arthrocardia "fine"	Geniculate		1.8	-4.62	-17.04	28.74	-1.26	53	576	245	3.1	14.4	195	39	1.2	0.22		0.15	73.75	0.72			57.78	0.37			24.63
Corallina	Corallina/Arthrocardia "fine"	Geniculate		1.8	-4.63	-16.29	27.35	-1.38											0.01	15.38	0.67			1.16				39.81	0.33
Corallina	Corallina/Arthrocardia "fine"	Geniculate		1.8	-5.67		28.86	-2.29	69	533	252	3.1	10.2	284	58	1.6	0.27		0.05		0.07					0.22	0.28		0.54
Corallina	Corallina/Arthrocardia "fine"	Geniculate		1.8	-4.79		27.78	-1.47	57	489	260	3.1	11.9	233	24	0.4	0.22		-0.01	31.08	0.65			-1.01				17.36
Corallina	Corallina/Arthrocardia "fine"	Geniculate		2.3	-3.53	-16.06	27.2	-1.65	269	527	292	3.1	6.6	272	182	21.3	0.92		0.06	42.65	0.69	-11.35	-4.41	-1.54				49.87
Corallina	Corallina/Arthrocardia "fine"	Geniculate		2.3	-2.52		27.24	-1.1	56	493	264	3.1	13.7	229	42	0.7	0.21		0.02	130.06	0.66	-26.83		-8.96				33.63
Corallina	Corallina/Arthrocardia "fine"	Geniculate		2.3	-4.93	-20.1	26.85	-1.45	58	613	240	3.1	8.5	194	43	1.4	0.24				0.72				0.72	0.13	0.44		0.4
Corallina	Corallina/Arthrocardia "fine"	Geniculate		2.3	-4.32	-19.05	26.55	-1.66	63	571	262	3.3	12.1	215	35	1	0.24		0.02		0.69				0.41	0.16	0.28
Corallina	Corallina/Arthrocardia "fine"	Geniculate		2.3	-4.8		26.76	-1.45	103	506	259	3.1	6	301	78	3.6	0.4		0		0.67				0.89	0.11	0.29		0.25
Spongites	Pneophyllum complex	Non-geniculate		0.6	-3.15	-25	25.36	-2.07	46	557	217	3.2	7	146	12	1.1	0.21		0.03	3.06	0.65	-1.27	-2.29	-3.27	0.48	0.22	1.42	8.05	0.4
Spongites	Pneophyllum complex	Non-geniculate		0.6	-4.38	-23.05	24.37	-1.67	39	463	214	3.4	6.1	115	12	0.3	0.18		0.06	1.73	0.65	-1.85	1.06	-1.03				15.32	0.48
Spongites	Pneophyllum complex	Non-geniculate		0.6	-2.38	-24.33	26.34	-1.64		479	208	3.5	6.7	222	8	0.7			0.01	8.16	0.67	-2.74	1.81	10.35	1.15	1.11	1.61		0.43
Spongites	Pneophyllum complex	Non-geniculate		0.6	-3.36	-23.8	23.22	-1.89	48	600	204	3.3	8.6	194	22	1.5	0.24			7.46	0.65	-3.19	-1.2		1.07	0.35	2.71	12.39	0.3
Spongites	Pneophyllum complex	Non-geniculate		1.2	-2.19	-21.23	25.24	-2.27	60	664	229	3.1	9.6	210	17	31.12	0.26			11.12	0.64			8.08	1.06	0.61	2.53	10.92	1.07
Spongites	Pneophyllum complex	Non-geniculate		1.2	-3.22	-21.96	26.07	-2.48	66	619	233	3.2	9.1	209	22	1.4	0.28		0.01	4.94	0.64			3.77	0.89	0.3	0.68	16.97	1.03
Spongites	Pneophyllum complex	Non-geniculate		1.2	-3.85	-24.71	25.23	-1.95	68	521	233	3.3	8.9	170	20	2.8	0.29		0.11		0.65								0.35
Spongites	Pneophyllum complex	Non-geniculate		1.2	-2.51		21.96	-1.23											0.13	2.49	0.61			0.67	0.49	0.49	1.36		0.02
Spongites	Pneophyllum complex	Non-geniculate		1.8	-2.97	-21.79	23.99	-2.1	41	683	213	2.1	7.9	158	13	0.4	0.19		0.05		0.64				0.93	0.41	1.51	11.45	0.28
Spongites	Pneophyllum complex	Non-geniculate		1.8	-2.17	-20.16	25.02	-1.66	51	615	214	3.1	17.1	182	34	4.6	0.24		0.02		0.67				0.73	0.83	1.47		0.44
Spongites	Pneophyllum complex	Non-geniculate		1.8	-1.75	-17.79	20.28	-2.2	48	727	226	3.1	9.9	174	18	0.8	0.21		0.31	4.92	0.62			10.18	0.72	0.45	1.31	21	0.45
Spongites	Pneophyllum complex	Non-geniculate		1.8	-2.55	-21.92	24.81	-2.14	52	621	230	3.3	7.1	163	11	0.4	0.23		0.21	4	0.65			17.16	0.53	0.31	0.48	21.63	0.64
Spongites	Pneophyllum complex	Non-geniculate		1.8	-2.35	-19.9	26.28	-2.41	52	563	232	3.3	6.3	136	10	0.4	0.22				0.59				0.45	0.26	0.68		0.2
Spongites	Pneophyllum complex	Non-geniculate		2.3	-1.42		24.95	-1.31	44	613	222	3.2	6.4	179	17	0.7	0.2				0.68				0.83	0.53	0.37	14.38
Spongites	Pneophyllum complex	Non-geniculate		2.3	-2.83		23.68	-1.92	42	637	214	3.2	6.6	171	14	0.5	0.2		0.13	5.01	0.69	-2.96	-1.97	6.91				17.47	0.37
Spongites	Pneophyllum complex	Non-geniculate		2.3	-2.48	-24.05	25.84	-2.03	44	634	216	3.2	8.5	147	15	0.4	0.2		0.12	6.62	0.63	-2.51	0.37	5.97	0.8	0.28	2.19	26.09	0.46
Spongites	Pneophyllum complex	Non-geniculate		2.3	-2.78	-23.99	24.47	-1.91	46	574	212	3.4	6.9	164	9	0.6	0.22		0.23	9.03	0.66	-2.43	5.09	22.85	1.08	0.5	2.07	29.82	0.38
Spongites	Pneophyllum complex	Non-geniculate		2.3					43	566	219	3.1	6.2	126	4	0.1	0.2
Phymatolithon	Phymatolithopsis complex	Non-geniculate		0.6	-4.35	-24.42	26.96	-1.75	43	433	228	3.5	6.2	106	10	0.2	0.19		0.11	0.13	0.63		-35.27					7.99	0.47
Phymatolithon	Phymatolithopsis complex	Non-geniculate		0.6	-4.26	-22.1	25.71	-1.55											0.26	0.84	0.61	-3.7	2.98	-9.48				13.97	0.24
Phymatolithon	Phymatolithopsis complex	Non-geniculate		0.6	-5.2	-22.11	24.19	-1.67	42	397	218	3.5	5.9	123	30	0.7	0.19		0.41		0.6								0.52
Phymatolithon	Phymatolithopsis complex	Non-geniculate		0.6			27.73		40	406	212	3.5	6.6	170	28	0.5	0.19				0.63			-3.87
Phymatolithon	Phymatolithopsis complex	Non-geniculate		0.6	-4.51		25.21	-1.69	47	380	225	3.5	5.9	125	49	0.8	0.21		0.11		0.6	-1.98	3.03		0.14	0.04	0.12
Phymatolithon	Phymatolithopsis complex	Non-geniculate		1.2	-4.39	-20.47	26.63	-1.99	45	391	225	3.5	5.5	115	18	0.3	0.2		0.12	1.32	0.64			-0.89				8.66	0.37
Phymatolithon	Phymatolithopsis complex	Non-geniculate		1.2	-4.18	-22.16	24.43	-1.93	51	363	210	3.6	6.2	173	18	0.2	0.24			4.09	0.66			1.91				5.83	0.16
Phymatolithon	Phymatolithopsis complex	Non-geniculate		1.2	-1.09	-13.87	25.29	-1.16											0.05		0.58				0.05	0.03	0.15		0.51
Phymatolithon	Phymatolithopsis complex	Non-geniculate		1.2	-2.24		24.42	-1.48											0.64		0.56				0.35	0.1	0.42
Phymatolithon	Phymatolithopsis complex	Non-geniculate		1.8	-2.98	-18.89	25.11	-1.47	40	453	216	4.5	6.1	344	14	1.1	0.19		0.45		0.62			28.44
Phymatolithon	Phymatolithopsis complex	Non-geniculate		1.8	-2.44	-13.46	27.18	-1.09	50	430	199	4.8	6.7	444	44	1.2	0.25		0.27		0.53				0.04	0.07	0.07		0.49
Phymatolithon	Phymatolithopsis complex	Non-geniculate		1.8	-3.34	-14.65	26.17	-1.22	47	379	210	3.6	6.8	199	61	1.3	0.23		0.45		0.63				0.06	0.04	0.15
Phymatolithon	Phymatolithopsis complex	Non-geniculate		1.8	-2.83	-15.96	25.01	-1.89	48	436	255	3.7	5.6	100	2	0.1	0.19		0.16	0.05	0.6			-5.45				17.51
Phymatolithon	Phymatolithopsis complex	Non-geniculate		1.8	-3.13	-14.97	24.43	-1.75	42	493	231	3.6	5.8	175	14	0.4	0.18		0.11	0.06	0.56			-11.72				19.19	0.59
Phymatolithon	Phymatolithopsis complex	Non-geniculate		2.3	-2.68	-16.24	25.68	-1.27	53	542	236	3.9	8.1	202	19	0.6	0.22		0.11		0.63				0.05	0.04	0.14
Phymatolithon	Phymatolithopsis complex	Non-geniculate		2.3	-2.08	-16.74	22.93	-1.57	77	456	252	3.7	9.6	245	33	5	0.31		0.13		0.58				0.06	0.01	0.04		0.43
Phymatolithon	Phymatolithopsis complex	Non-geniculate		2.3	-1.2		25.08	-1.56	40	458	242	3.6	6.7	134	24	0.2	0.17			1.75	0.62	-2.07	-17.59	3.24
Phymatolithon	Phymatolithopsis complex	Non-geniculate		2.3	-1.34		24.74	-1.65	47	640	256	3.6	5.1	149	12	0.2	0.18		0.28	10.01	0.55	-4.38	0.58	-0.11				10.87	0.29
Phymatolithon	Phymatolithopsis complex	Non-geniculate		2.3	-3.6	-12.65	26.37	-1.5		401	247	3.1	4.8	141	26	0.4			0.11	3.85	0.63	-1.88	-2.8	36.78	0.04	0.04	0.3	14.5

## Sheet: Table S2
Table S2: Comparison of linear and quadratic models based on AIC for the geochemical parameters measured in this study.
δ13Cinorganic against irradiance
Organism	Linear					Quadratic					Best Fit	Probability the Best Fit Graph is Correct	Diff in AICc
	Regression	p	R²	RMSE	AICc	Regression	p	R²	RMSE	AICc
Corallina/Arthrocardia "robust"	Y = -0.02314X - 5.563	0.9484	0.0002541	0.9994	5.465	Y = 0.5152X² - 1.507X - 4.715		0.0294	0.957	8.16	Linear	0.7937	-2.695
Corallina/Arthrocardia "fine"	Y = 0.8457X - 6.324	0.019	0.2695	0.9361	2.75	Y = 1.386X² - 3.163X - 3.992		0.4469	0.7928	0.3534	Quadratic	0.7682	2.397
Pneophyllum complex	Y = 0.5936X - 3.630	0.0244	0.2946	0.6342	-9.766	Y = -0.0004515X² + 0.06607X - 4.736		0.309	0.6077	-6.576	Linear	0.7502	-2.199
Phymatolithopsis complex	Y = 1.259X - 5.040	0.0025	0.446	0.9428	3.475	Y = -0.5361X² + 2.822X - 5.960		0.4658	0.8982	6.181	Linear	0.7946	-2.706
δ13Corganic against irradiance
Organism	Linear					Quadratic					Best Fit	Probability the Best Fit Graph is Correct	Diff in AICc
	Regression	p	R²	RMSE	AICc	Regression	p	R²	RMSE	AICc
Corallina/Arthrocardia "robust"	Y = 0.7443X - 20.10	0.2889	0.1583	1.364	14.13	Y = - 0.07294X² + 0.9674X - 20.24		0.1585	1.276	21.32	Linear	0.9734	-7.197
Corallina/Arthrocardia "fine"	Y = -0.3160X - 17.22	0.6851	0.02491	1.606	17.07	Y = -1.248X² + 3.259X - 19.13		0.08927	1.452	23.66	Linear	0.9642	-6.585
Pneophyllum complex	Y = -14.85X - 1073	0.2591	0.1047	888.7	26.06	Y = -0.004035X² + 0.4420X - 32.86		0.5762	1.377	23.36	Quadratic	0.9706	6.991
Phymatolithopsis complex	Y = 4.772X - 25.02	0.0012	0.5947	2.559	32.55	Y = -2.609X² + 12.24X - 29.40		0.6413	2.313	34.88	Linear	0.7626	-2.334
δ18Oinorganic against irradiance
Organism	Linear					Quadratic					Best Fit	Probability the Best Fit Graph is Correct	Diff in AICc
	Regression	p	R²	RMSE	AICc	Regression	p	R²	RMSE	AICc
Corallina/Arthrocardia "robust"	Y = 0.01303X - 1.465	0.9532	0.0001971	0.6238	-13.48	Y = -0.4490X² + 1.312X - 2.221		0.05756	0.5895	-11.5	Linear	0.7296	-1.985
Corallina/Arthrocardia "fine"	Y = 0.03192X - 1.560	0.7762	0.004606	0.3155	-40.75	Y = -0.05258X² + 0.1840X - 1.648		0.007668	0.3066	-37.65	Linear	0.8253	-3.105
Pneophyllum complex	Y = -0.02427X - 1.898	0.8639	0.002022	0.3579	-29.22	Y = 0.3764X² - 1.108X -1.266		0.1248	0.3245	-27.96	Linear	0.652	-1.255
Phymatolithopsis complex	Y = 0.1097X - 1.735	0.267	0.07635	0.2563	-43.41	Y = -0.03579X² + 0.2140X - 1.796		0.07835	0.2484	-40.09	Linear	0.8405	-3.324
δ11B against irradiance
Organism	Linear					Quadratic					Best Fit	Probability the Best Fit Graph is Correct	Diff in AICc
	Regression	p	R²	RMSE	AICc	Regression	p	R²	RMSE	AICc
Corallina/Arthrocardia "robust"	Y = 0.2640X + 26.06	0.6541	0.01209	1.64	24.28	Y = 1.899X² - 5.251X + 29.26		0.1609	1.469	24.43	NA	51.95% (linear)	-0.1559
Corallina/Arthrocardia "fine"	Y = -0.2944X + 27.86	0.3742	0.04411	0.9214	2.12	Y = 0.2858X² - 1.121X + 28.34		0.05429	0.8921	5.073	Linear	0.814	-2.952
Pneophyllum complex	Y = -0.1526X + 24.77	0.8039	0.004239	1.63	22.33	Y = 0.6305X² -2.035X + 25.90		0.02603	1.561	25.44	Linear	0.8257	-3.111
Phymatolithopsis complex	Y = -0.4659X + 26.13	0.2784	0.0687	1.181	11.81	Y = 0.06902X² - 0.6646X + 26.24		0.06904	1.147	15.06	Linear	0.8355	-3.25
Li/Ca against irradiance
Organism	Linear					Quadratic					Best Fit	Probability the Best Fit Graph is Correct	Diff in AICc
	Regression	p	R²	RMSE	AICc	Regression	p	R²	RMSE	AICc
Corallina/Arthrocardia "robust"	Y = 18.36X + 83.71	0.5728	0.01908	90.62	176.7	Y = -113.6X² + 345.5X - 103.3		0.1882	80.12	176.4	Quadratic	0.5421	0.3378
Corallina/Arthrocardia "fine"	Y = 28.52X + 31.40	0.1159	0.1473	48.38	145.2	Y = 27.79X² - 51.83X + 77.18		0.1784	46.08	147.9	Linear	0.7936	-2.693
Pneophyllum complex	Y = -3.807X + 55.54	0.2886	0.07996	8.54	74.5	Y = -17.80X² + 48.63X + 24.10		0.5204	5.957	67.71	Quadratic	0.9675	6.787
Phymatolithopsis complex	Y = 5.359X + 39.25	0.1442	0.1566	8.734	71.05	Y = 5.278X² - 9.651X + 47.60		0.19	8.248	74.26	Linear	0.8329	-3.213
B/Ca against irradiance
Organism	Linear					Quadratic					Best Fit	Probability the Best Fit Graph is Correct	Diff in AICc
	Regression	p	R²	RMSE	AICc	Regression	p	R²	RMSE	AICc
Corallina/Arthrocardia "robust"	Y = 46.79X + 446.2	0.071	0.1698	69.55	175.1	Y = 17.79X² - 4.655X + 476.2		0.1758	67.45	178.1	Linear	0.8192	-3.021
Corallina/Arthrocardia "fine"	Y = 11.83X + 509.9	0.4624	0.03219	44.56	149.8	Y = 8.148X² - 11.83X + 523.6		0.03582	43.22	153	Linear	0.7201	-1.89
Pneophyllum complex	Y = 50.04X + 518.2	0.0479	0.2362	61.92	146	Y = -88.68X² + 307X + 370.1		0.4083	52.77	145.1	Quadratic	0.6051	0.8532
Phymatolithopsis complex	Y = 57.56X + 350.1	0.0249	0.3106	60.48	137.1	Y = 68.09X² - 138.4X + 460.1		0.4043	54.32	138.4	Linear	0.6569	-1.299
Mg/Ca against irradiance
Organism	Linear					Quadratic					Best Fit	Probability the Best Fit Graph is Correct	Diff in AICc
	Regression	p	R²	RMSE	AICc	Regression	p	R²	RMSE	AICc
Corallina/Arthrocardia "robust"	Y = 12.86X + 219.1	0.4394	0.03356	46.39	158.9	Y = 26.79X² - 64.60X + 264.2		0.06924	44.31	161.3	Linear	0.7698	-2.414
Corallina/Arthrocardia "fine"	Y = 19.82X + 216.6	0.0023	0.4515	15.41	104	Y = 2.727X² + 11.94X + 221.1		0.4534	14.92	107.3	Linear	0.8389	-3.3
Pneophyllum complex	Y = 1.962X + 216.7	0.5857	0.02027	9.387	81.86	Y = -20.17X² + 60.43X + 183		0.5175	6.379	73.3	Quadratic	0.9863	8.552
Phymatolithopsis complex	Y = 13.92X + 206.9	0.0327	0.2864	15.5	93.57	Y = 24.76X² - 57.33X + 246.8		0.4816	12.76	92.09	Quadratic	0.6767	1.477
Sr/Ca against irradiance
Organism	Linear					Quadratic					Best Fit	Probability the Best Fit Graph is Correct	Diff in AICc
	Regression	p	R²	RMSE	AICc	Regression	p	R²	RMSE	AICc
Corallina/Arthrocardia "robust"	Y = -0.08111X + 3.560	0.8507	0.002021	1.212	13.08	Y = -0.7795X² + 2.173X + 2.248		0.04774	1.152	15.31	Linear	0.753	-2.229
Corallina/Arthrocardia "fine"	Y = 0.06800X + 2.996	0.1177	0.1377	0.1169	-76.07	Y = -0.08598X² + 0.3177X + 2.851		0.1901	0.1101	-74.01	Linear	0.7376	-2.067
Pneophyllum complex	Y = -0.07737X + 3.350	0.1187	0.1544	0.1246	-65.1	Y = 0.1611X² - 0.5442X + 3.619		0.3097	0.109	-65.06	N/A	50.46% (linear)	-0.03669
Phymatolithopsis complex	Y = 0.1206X + 3.509	0.4547	0.04053	0.4139	-22.36	Y = -0.5352X² + 1.661X + 2.645		0.2125	0.3623	-21.89	Linear	0.5591	-0.4751
Ba/Ca against irradiance
Organism	Linear					Quadratic					Best Fit	Probability the Best Fit Graph is Correct	Diff in AICc
	Regression	p	R²	RMSE	AICc	Regression	p	R²	RMSE	AICc
Corallina/Arthrocardia "robust"	Y = 0.1604X + 14.21	0.9526	0.000202	7.586	86.45	Y = -12.97X² + 37.65X - 7.605		0.3236	6.073	81.8	Quadratic	0.9108	4.648
Corallina/Arthrocardia "fine"	Y = -1.065X + 12.78	0.6173	0.01501	5.926	73.1	Y = -3.990X² + 10.52X + 6.059		0.06512	5.611	75.37	Linear	0.7563	-2.265
Pneophyllum complex	Y = 0.05302X + 8.141	0.9589	0.0001832	2.695	39.42	Y = -4.116X² + 11.98X + 1.268		0.2564	2.25	37.87	Quadratic	0.6842	1.546
Phymatolithopsis complex	Y = 0.5928X + 5.525	0.2124	0.1087	1.197	11.63	Y = 1.123X² - 2.640X + 7.340		0.1929	1.101	13.68	Linear	0.7359	-2.05
IRRADIANCE AGAINST U/Ca
Organism	Linear					Quadratic					Best Fit	Probability the Best Fit Graph is Correct	Diff in AICc
	Regression	p	R²	RMSE	AICc	Regression	p	R²	RMSE	AICc
Corallina/Arthrocardia "robust"	Y = 31.75X + 213.5	0.2154	0.08393	70.52	175.6	Y = 16.93X² - 17.20X + 242		0.08977	68.42	178.7	Linear	0.8204	-3.039
Corallina/Arthrocardia "fine"	Y = -4.542X + 255.7	0.7434	0.006468	38.68	144.4	Y = -28.04X² + 76.89X + 208.4		0.06507	36.47	146.5	Linear	0.741	-2.102
Pneophyllum complex	Y = -11.42X + 186.4	0.3201	0.06586	29.59	120.9	Y = -22.53X²+ 53.86X + 148.8		0.1253	27.72	123.3	Linear	0.7658	-2.369
Phymatolithopsis complex	Y = 39.93X + 120.9	0.2691	0.0864	91.59	150.4	Y = -97.25X² + 319.8X - 36.17		0.1969	82.96	152	Linear	0.6872	-1.574
Mn/Ca against irradiance
Organism	Linear					Quadratic					Best Fit	Probability the Best Fit Graph is Correct	Diff in AICc
	Regression	p	R²	RMSE	AICc	Regression	p	R²	RMSE	AICc
Corallina/Arthrocardia "robust"	Y = -0.3656X + 100.2	0.9914	6.609e-06	95.61	187.8	Y = -104.5X² + 301.9X - 75.72		0.1323	86.69	188.1	Linear	0.5408	-0.3275
Corallina/Arthrocardia "fine"	Y = 6.740X + 47.54	0.6545	0.01206	41.91	147.4	Y = 28.518X² -76.05X + 95.60		0.06337	39.66	149.7	Linear	0.7543	-2.244
Pneophyllum complex	Y = -1.460X + 17.50	0.5792	0.02097	7.091	72.32	Y = -10.99X² + 30.79X - 1.102		0.2733	5.916	70.74	Quadratic	0.6877	1.579
Phymatolithopsis complex	Y = -2.450X + 29.00	0.6925	0.01151	16.01	94.61	Y = 2.268X² - 8.977X + 32.66		0.01364	15.45	98.21	Linear	0.8583	-3.602
Fe/Ca against irradiance
Organism	Linear					Quadratic					Best Fit	Probability the Best Fit Graph is Correct	Diff in AICc
	Regression	p	R²	RMSE	AICc	Regression	p	R²	RMSE	AICc
Corallina/Arthrocardia "robust"	Y = 0.9404X + 1.138	0.4543	0.03148	3.507	55.59	Y = -2.743X² + 8.873X - 3.478		0.09707	3.296	57.35	Linear	0.7072	-1.764
Corallina/Arthrocardia "fine"	Y = 2.403X - 1.204	0.1509	0.1175	4.527	62.87	Y = 2.975X² - 6.235X + 3.810		0.1602	4.291	65.18	Linear	0.7607	-2.313
Pneophyllum complex	Y = -0.2846X + 1.485	0.5148	0.02882	1.137	10.08	Y = -1.341X² + 3.603X - 0.7555		0.1774	1.013	10.74	Linear	0.5823	-0.6648
Phymatolithopsis complex	Y = 0.4519X + 0.1104	0.3275	0.06849	1.176	11.04	Y = 0.5616X² - 1.164X + 1.017		0.09128	1.122	14.28	Linear	0.8348	-3.24
Li/Mg against irradiance
Organism	Linear					Quadratic					Best Fit	Probability the Best Fit Graph is Correct	Diff in AICc
	Regression	p	R²	RMSE	AICc	Regression	p	R²	RMSE	AICc
Corallina/Arthrocardia "robust"	Y = -0.04692X + 0.6546	0.876	0.001474	0.8408	-1.103	Y = -0.9764X² + 2.764X - 0.9524		0.1492	0.7542	-0.8875	N/A	52.69% (linear)	-0.2157
Corallina/Arthrocardia "fine"	Y = 0.08387X + 0.1671	0.1632	0.1178	0.1619	-59.96	Y = 0.08274X² - 0.1554X + 0.3034		0.1433	0.1547	-57.13	Linear	0.8049	-2.834
Pneophyllum complex	Y = -0.01583X + 0.2487	0.2296	0.1013	0.03118	-105.1	Y = -0.05580X² + 0.1486X + 0.1502		0.4186	0.02423	-108.4	Quadratic	0.8411	3.332
Phymatolithopsis complex	Y = 0.01206X + 0.1908	0.4211	0.05042	0.03675	-93.07	Y = -0.004079X² + 0.02366 + 0.1844		0.05169	0.03539	-89.27	Linear	0.8698	-3.798

## Sheet: Table S3
Table S3: Comparison of linear and quadratic models based on AIC for the physiological parameters published in Krieger et al., (2023).
Calcification_mgCaCO3_cm-2_d-1 against irradiance
Organism	Linear					Quadratic					Best Fit	Probability the Best Fit Graph is Correct	Diff in AICc
	Regression	p	R²	RMSE	AICc	Regression	p	R²	RMSE	AICc
Corallina/Arthrocardia "robust"	Y = 0.03465X - 0.05112	0.3766	0.04367	0.109	-83.25	Y = -0.01599X² + 0.08088X - 0.07802		0.04594	0.106	-80.13	Linear	0.8263	-3.119
Corallina/Arthrocardia "fine"	Y = -0.003164X + 0.04602	0.8681	0.001899	0.0454	-99.42	Y = -0.05049X² + 0.1456X - 0.04599		0.1361	0.0409	-98.38	Linear	0.6263	-1.033
Pneophyllum complex	Y = 0.07952X - 0.01005	0.0539	0.2974	0.08224	-58.46	Y = -0.02410X² + 0.1488X - 0.05050		0.3403	0.07835	-54.25	Linear	0.8911	-4.204
Phymatolithopsis complex	Y = -0.02380X + 0.2716	0.7338	0.008523	0.1752	-49.88	Y = -0.1493X² + 0.4034X + 0.02765		0.08811	0.1623	-47.59	Linear	0.7593	-2.298
Net_PS_ugO2_cm-2_h-1 against irradiance
Organism	Linear					Quadratic					Best Fit	Probability the Best Fit Graph is Correct	Diff in AICc
	Regression	p	R²	RMSE	AICc	Regression	p	R²	RMSE	AICc
Corallina/Arthrocardia "robust"	Y = 8.113X + 8.471	0.3472	0.1267	15.82	58.24	Y = 17.40X² - 43. 28X + 38.80		0.2588	13.63	63.96	Linear	0.9459	-5.724
Corallina/Arthrocardia "fine"	Y = 42.55X - 24.54	0.0197	0.4711	32.6	83.88	Y = 23.30X² - 21.93X + 10.05		0.5006	30.05	88.48	Linear	0.9091	-4.607
Pneophyllum complex	Y = 0.8766X + 4.589	0.4958	0.04759	2.888	32.26	Y = 0.8258X² - 1.493X + 5.913		0.05677	2.74	36.86	Linear	0.9088	-4.598
Phymatolithopsis complex	Y = 2.215X - 1.015	0.1934	0.2282	3.025	28.46	Y = 2.4X² - 4.871X + 3.167		0.2889	2.716	34.93	Linear	0.962	-6.463
Fv_Fm against irradiance
Organism	Linear					Quadratic					Best Fit	Probability the Best Fit Graph is Correct	Diff in AICc
	Regression	p	R²	RMSE	AICc	Regression	p	R²	RMSE	AICc
Corallina/Arthrocardia "robust"	Y = 0.001014X + 0.6650	0.9294	0.0004484	0.03219	-132.1	Y = -0.02578X² + 0.07557X + 0.626		0.07146	0.03019	-130.4	Linear	0.6998	-1.693
Corallina/Arthrocardia "fine"	Y = 0.004332X + 0.6121	0.95	0.000225	0.1942	-60.17	Y = 0.1845X² - 0.5291X + 0.9925		0.1002	0.173	-59.11	Linear	0.6295	-1.06
Pneophyllum complex	Y = 0.003578X + 0.6411	0.7254	0.00847	0.0257	-118.8	Y = 0.04088X² - 0.1141X + 0.7089		0.2876	0.02109	-120.9	Quadratic	0.744	2.133
Phymatolithopsis complex	Y = -0.01047X + 0.6188	0.4087	0.0405	0.03509	-121.8	Y = 0.01376X² - 0.05009X + 0.6414		0.05669	0.03381	-118.9	Linear	0.8126	-2.934
Dark_respiration_ugO2_cm-2_h-1 against irradiance **(missing data - quadratic can't be plotted)
Organism	Linear					Quadratic					Best Fit	Probability the Best Fit Graph is Correct	Diff in AICc
	Regression	p	R²	RMSE	AICc	Regression	p	R²	RMSE	AICc
Corallina/Arthrocardia "robust"	Y = 1.199X - 17.55	0.6669	0.07008	4.696
Corallina/Arthrocardia "fine"	Y = -1.937X - 14.63	0.756	0.0372	10.6
Pneophyllum complex	Y = -0.2181X - 2.132	0.5152	0.08921	0.6938
Phymatolithopsis complex	Y = 0.03725X - 2.862	0.9618	0.0008983	1.336
Dark_calc_ugCaCO3_cm-2_h-1 against irradiance **(missing data - quadratic can't be plotted)
Organism	Linear					Quadratic					Best Fit	Probability the Best Fit Graph is Correct	Diff in AICc
	Regression	p	R²	RMSE	AICc	Regression	p	R²	RMSE	AICc
Corallina/Arthrocardia "robust"	Y = 8.593X - 70.39	0.7395	0.04246	43.88
Corallina/Arthrocardia "fine"	Y = -2.226X + 0.7109	0.3208	0.7668	1.704
Pneophyllum complex	Y = 0.7755X - 0.6203	0.5529	0.0748	2.715
Phymatolithopsis complex	Y = 1.853X - 10.87	0.8321	0.01263	17.05
Light_calc_ugCaCO3_cm-2_h-1 against irradiance
Organism	Linear					Quadratic					Best Fit	Probability the Best Fit Graph is Correct	Diff in AICc
	Regression	p	R²	RMSE	AICc	Regression	p	R²	RMSE	AICc
Corallina/Arthrocardia "robust"	Y = 11.78X - 23.78	0.4185	0.09546	26.93	67.82	Y = 46.68X² - 132X + 61.06		0.4648	19.38	70.29	Linear	0.7753	-2.476
Corallina/Arthrocardia "fine"	Y = 9.288X - 15.53	0.5059	0.05063	29.09	81.37	Y = -2.323X² + 15.72X - 18.98		0.05129	27.59	86.6	Linear	0.9318	-5.23
Pneophyllum complex	Y = 6.720X - 2.292	0.0506	0.3609	6.508	48.43	Y = -1.331X² + 10.60X - 4.538		0.3642	6.158	53.61	Linear	0.9303	-5.181
Phymatolithopsis complex	Y = 11.13X - 13.82	0.1818	0.2109	15.05	62	Y = 3.251X² + 1.593X - 8.136		0.2154	14.15	67.94	Linear	0.9513	-5.943
Chl_a_mg_g-1 against irradiance
Organism	Linear					Quadratic					Best Fit	Probability the Best Fit Graph is Correct	Diff in AICc
	Regression	p	R²	RMSE	AICc	Regression	p	R²	RMSE	AICc
Corallina/Arthrocardia "robust"	Y = 0.06205X + 0.2800	0.0838	0.2694	0.06604	-58.41	Y = -0.06880X² + 0.2572X + 0.1657		0.3616	0.05886	-55.31	Linear	0.8246	-3.095
Corallina/Arthrocardia "fine"	Y = 0.2031X + 0.1656	0.2328	0.2692	0.1807	-12.31	Y = 0.5212X² - 1.630X + 1.666		0.4249	0.1463	0.01403	Linear	0.9979	-12.32
Pneophyllum complex	Y = -0.04467X + 0.8687	0.697	0.01308	0.2521	-32.35	Y = 0.2654X² - 0.8038X + 1.313		0.1341	0.2268	-30.13	Linear	0.7515	-2.213
Phymatolithopsis complex	Y = -0.08692X + 0.2454	0.1899	0.2669	0.09855	-27.38	Y = -0.04388X² + 0.04829X + 0.1576		0.284	0.09017	-18.23	Linear	0.9898	-9.145
PC_ug_g-1 against irradiance
Organism	Linear					Quadratic					Best Fit	Probability the Best Fit Graph is Correct	Diff in AICc
	Regression	p	R²	RMSE	AICc	Regression	p	R²	RMSE	AICc
Corallina/Arthrocardia "robust"	Y = 0.07243X + 0.1123	0.2232	0.1443	0.114	-45.31	Y = -0.1731X² + 0.5633X - 0.1753		0.3737	0.09297	-44.34	Linear	0.6188	-0.969
Corallina/Arthrocardia "fine"	Y = -0.005830X + 0.1761	0.84	0.007351	0.04635	-39.44	Y = -0.1121X²+ 0.3396X - 0.04822		0.6901	0.02398	-39.42	NA
Pneophyllum complex	Y = -0.06882X + 0.5797	0.5485	0.03079	0.2508	-32.48	Y = 0.05407X² - 0.02235X + 0.6703		0.03578	0.2404	-28.51	Linear	0.8793	-3.972
Phymatolithopsis complex	Y = -0.01402X + 0.06991	0.4304	0.1064	0.0278	-47.63	Y = -0.03987X² + 0.1088X - 0.009852		0.3225	0.02241	-40.51	Linear	0.9723	-7.118
PE_ug_g-1 against irradiance
Organism	Linear					Quadratic					Best Fit	Probability the Best Fit Graph is Correct	Diff in AICc
	Regression	p	R²	RMSE	AICc	Regression	p	R²	RMSE	AICc
Corallina/Arthrocardia "robust"	Y = 0.06413X + 0.3705	0.6735	0.01848	0.302	-21.92	Y = -0.2832X² + 0.8673X - 0.1002		0.1188	0.2728	-18.5	Linear	0.8469	-3.42
Corallina/Arthrocardia "fine"	Y = -0.003422X + 0.2900	0.9677	0.0002518	0.1416	-26.65	Y = 0.2529X² - 0.7920X + 0.8185		0.3464	0.1071	-23.27	Linear	0.8439	-3.375
Pneophyllum complex	Y = -0.3229X + 1.948	0.3433	0.07502	0.7365	-2.323	Y = 0.6798X² - 2.268X + 3.087		0.1622	0.6734	0.3358	Linear	0.7907	-2.658
Phymatolithopsis complex	Y = -0.03191X + 0.2276	0.7034	0.02591	0.1339	-22.48	Y = -0.07673X² + 0.2045X + 0.07409		0.06353	0.1215	-13.46	Linear	0.9891	-9.018
ETRmax against irradiance
Organism	Linear					Quadratic					Best Fit	Probability the Best Fit Graph is Correct	Diff in AICc
	Regression	p	R²	RMSE	AICc	Regression	p	R²	RMSE	AICc
Corallina/Arthrocardia "robust"	Y = 7.686X + 7.645	0.035	0.551	5.051	35.61	Y = -5.240X² + 23.14X - 1.635		0.6176	4.316	43.66	Linear	0.9824	-8.049
Corallina/Arthrocardia "fine"	Y = 64.68X + 15.63	0.0023	0.6633	33.33	84.36	Y = -18.56X² + 116X - 11.92		0.6747	31.08	89.22	Linear	0.9191	-4.859
Pneophyllum complex	Y = 5.974X + 7.764	0.0238	0.415	5.206	46.41	Y = 1.922X² + 0.3776X + 10.95		0.2518	196.6	50.93	Linear	0.9058	-4.526
Phymatolithopsis complex	Y = 2.967X + 7.938	0.2927	0.1814	4.643	34.26	Y = -0.5889X² + 4.670X + 6.947		0.1831	4.294	43.58	Linear	0.9906	-9.316
FWHM against irradiance
Organism	Linear					Quadratic					Best Fit	Probability the Best Fit Graph is Correct	Diff in AICc
	Regression	p	R²	RMSE	AICc	Regression	p	R²	RMSE	AICc
Corallina/Arthrocardia "robust"	Y = -0.08248X + 0.7152	0.3296	0.08642	0.1684	-39.82	Y = -0.004326X² -0.07029X + 0.7081		0.08649	0.1612	-35.49	Linear	0.8972	-4.332
Corallina/Arthrocardia "fine"	Y = -0.02178X + 0.3719	0.7501	0.01341	0.1337	-32.48	Y = 0.1289X² - 0.3832X + 0.5724		0.1212	0.1189	-27.64	Linear	0.9185	-4.843
Pneophyllum complex	Y = -0.03520X + 0.5071	0.7616	0.00679	0.2768	-35.23	Y = -0.1824X² + 0.4806X + 0.2100		0.05371	0.2611	-32.37	Linear	0.8071	-2.862
Phymatolithopsis complex	Y = 0.03074X + 0.3637	0.6601	0.0254	0.1448	-30.87	Y = 0.06446X² - 0.1587X + 0.4728		0.04938	0.1349	-25.12	Linear	0.9466	-5.751

## Sheet: Table S4
Table S4: ANOVA testing geochemical and physiological data against changing irradiance
Corallina/Arthrocardia "robust"					Corallina/Arthrocardia "fine"					Pneophyllum complex					Phymatolithopsis complex
Parameters	F	P value	R²		Parameters	F	P value	R²		Parameters	F	P value	R²		Parameters	F	P value	R²
δ13Cinorganic * Irradiance	0.547	0.658	0.0986		δ13Cinorganic * Irradiance	4.826	0.014	0.475		δ13Cinorganic * Irradiance	2.062	0.155	0.3224		δ13Cinorganic * Irradiance	5.048	0.0141	0.5196
δ13Corganic * Irradiance	0.582	0.588	0.0162		δ13Corganic * Irradiance	0.464	0.72	0.2178		δ13Corganic * Irradiance	6.439	0.0106	0.6589		δ13Corganic * Irradiance	6.793	0.00891	0.6708
δ11B * Irradiance	2.218	0.128	0.3073		δ11B * Irradiance	7.777	0.002	0.5932		δ11B * Irradiance	0.159	0.922	0.0354		δ11B * Irradiance	0.636	0.603	0.1129
δ18O * Irradiance	2.261	0.121	0.2978		δ18O * Irradiance	0.449	0.721	0.0777		δ18O * Irradiance	0.917	0.46	0.1747		δ18O * Irradiance	0.517	0.677	0.09971
Li/Ca * Irradiance	1.06	0.395	0.175		Li/Ca * Irradiance	2.882	0.0733	0.3818		Li/Ca * Irradiance	10.05	0.00136	0.7153		Li/Ca * Irradiance	1.05	0.409	0.2227
B/Ca * Irradiance	3.101	0.0564	0.3676		B/Ca * Irradiance	0.263	0.851	0.0499		B/Ca * Irradiance	3.045	0.0668	0.4127		B/Ca * Irradiance	2.763	0.0879	0.4086
Mg/Ca * Irradiance	2.132	0.136	0.2856		Mg/Ca * Irradiance	3.835	0.034	0.4511		Mg/Ca * Irradiance	7.561	0.00355	0.6367		Mg/Ca * Irradiance	3.94	0.0361	0.4962
Sr/Ca * Irradiance	931	0.449	0.1486		Sr/Ca * Irradiance	1.655	0.219	0.2486		Sr/Ca * Irradiance	1.019	0.416	0.1904		Sr/Ca * Irradiance	1.947	0.176	0.3273
Ba/Ca * Irradiance	3.403	0.0435	0.3895		Ba/Ca * Irradiance	1.025	0.409	0.1701		Ba/Ca * Irradiance	2.15	0.143	0.3317		Ba/Ca * Irradiance	0.147	0.93	0.0354
U/Ca * Irradiance	0.444	0.725	0.0768		U/Ca * Irradiance	0.884	0.472	0.1502		U/Ca * Irradiance	1.064	0.398	0.1971		U/Ca * Irradiance	1.564	0.249	0.281
Mn/Ca * Irradiance	0.713	0.559	0.1179		Mn/Ca * Irradiance	0.638	0.602	0.1131		Mn/Ca * Irradiance	1.223	0.341	0.2201		Mn/Ca * Irradiance	0.251	0.859	0.0589
Fe/Ca * Irradiance	1.055	0.395	0.1652		Fe/Ca * Irradiance	1.558	0.241	0.2376		Fe/Ca * Irradiance	3.775	0.0379	0.4656		Fe/Ca * Irradiance	0.343	0.795	0.0791
Li/Mg * Irradiance	1.502	0.255	0.231		Li/Mg * Irradiance	1.629	0.228	0.2588		Li/Mg * Irradiance	5.795	0.011	0.5916		Li/Mg * Irradiance	0.245	0.863	0.0625
Calcification	2.136	0.136	0.286		Calcification	0.786	0.523	0.1535		Calcification	1.459	0.29	0.3272		Calcification	0.423	0.74	0.09569
Net_PS_ugO2_cm-2_h-1	1.019	0.458	0.3795		Net_PS_ugO2_cm-2_h-1	1.746	0.245	0.428		Net_PS_ugO2_cm-2_h-1	0.322	0.81	0.1078		Net_PS_ugO2_cm-2_h-1	2.039	0.227	0.5502
Fv_Fm	0.604	0.622	0.1018		Fv_Fm	0.559	0.649	0.0949		Fv_Fm	1.87	0.185	0.3014		Fv_Fm	0.471	0.707	0.0861
Dark_respiration_ugO2_cm-2_h-1	0.26	0.645	0.0797		Dark_respiration_ugO2_cm-2_h-1	0.099	0.773	0.032		Dark_respiration_ugO2_cm-2_h-1	0.497	0.512	0.0905		Dark_respiration_ugO2_cm-2_h-1	0.003	0.959	0.001036
Dark_calc_ugCaCO3_cm-2_h-1	0.488	0.535	0.14		Dark_calc_ugCaCO3_cm-2_h-1	3.192	0.325	0.7614		Dark_calc_ugCaCO3_cm-2_h-1	0.415	0.548	0.07669		Dark_calc_ugCaCO3_cm-2_h-1	0.021	0.891	0.00529
Light_calc_ugCaCO3_cm-2_h-1	1.468	0.329	0.4682		Light_calc_ugCaCO3_cm-2_h-1	1.218	0.372	0.3493		Light_calc_ugCaCO3_cm-2_h-1	1.764	0.241	0.4305		Light_calc_ugCaCO3_cm-2_h-1	0.568	0.656	0.2213
Chl_a_mg_g-1	2.251	0.16	0.4577		Chl_a_mg_g-1	1.45	0.336	0.4203		Chl_a_mg_g-1	0.716	0.565	0.1768		Chl_a_mg_g-1	1.076	0.454	0.4467
PC_ug_g-1	8.326	0.00765	0.7574		PC_ug_g-1	8.231	0.0347	0.8606		PC_ug_g-1	0.029	0.993	0.00871		PC_ug_g-1	0.627	0.634	0.32
PE_ug_g-1	4.428	0.041	0.6242		PE_ug_g-1	0.547	0.671	0.2472		PE_ug_g-1	0.599	0.63	0.1523		PE_ug_g-1	0.475	0.716	0.2627
ETRmax	2.346	0.214	0.6376		ETRmax	3.957	0.061	0.629		ETRmax	2.019	0.19	0.4309		ETRmax	4.488	0.0905	0.7709
FWHM	1.108	0.395	0.2697		FWHM	2.292	0.178	0.534		FWHM	0.185	0.905	0.04417		FWHM	0.752	0.56	0.2733
Legend
	Close to <0.05
	<0.05

## Sheet: Table S5
Table S5: T-test for parameters presenting significant ANOVA with changing irradiance (from Table S4)
Corallina/Arthrocardia "robust"				Corallina/Arthrocardia "fine"				Pneophyllum complex				Phymatolithopsis complex
Parameters		p-value		Parameters		p-value		Parameters		p-value		Parameters		p-value
Ba/Ca (p = 0.0435)	0.6 v.s. 1.2	0.4182		δ13Cinorganic (p = 0.014)	0.6 v.s. 1.2	0.5795		δ13Corganic (p = 0.0106)	0.6 v.s. 1.2	0.5397		δ13Cinorganic (p = 0.0141)	0.6 v.s. 1.2	0.1165
	0.6 v.s. 1.8	0.1365			0.6 v.s. 1.8	0.8978			0.6 v.s. 1.8	0.01158			0.6 v.s. 1.8	0.0804
	0.6 v.s. 2.3	0.967			0.6 v.s. 2.3	0.1104			0.6 v.s. 2.3	0.9999			0.6 v.s. 2.3	0.00879
	1.2 v.s. 1.8	0.8813			1.2 v.s. 1.8	0.233			1.2 v.s. 1.8	0.1823			1.2 v.s. 1.8	0.9998
	1.2 v.s. 2.3	0.2163			1.2 v.s. 2.3	0.0089			1.2 v.s. 2.3	0.699			1.2 v.s. 2.3	0.5964
	1.8 v.s. 2.3	0.0593			1.8 v.s. 2.3	0.3368			1.8 v.s. 2.3	0.0443			1.8 v.s. 2.3	0.6017
PC (p = 0.00765)	0.6 v.s. 1.2	0.6374		δ11B (p = 0.002)	0.6 v.s. 1.2	0.01146		Li/Ca (p = 0.00136)	0.6 v.s. 1.2	0.00335		δ13Corganic (p = 0.00891)	0.6 v.s. 1.2	0.2315
	0.6 v.s. 1.8	0.00873			0.6 v.s. 1.8	0.9884			0.6 v.s. 1.8	0.4099			0.6 v.s. 1.8	0.01048
	0.6 v.s. 2.3	0.9975			0.6 v.s. 2.3	0.05642			0.6 v.s. 2.3	0.9999			0.6 v.s. 2.3	0.01575
	1.2 v.s. 1.8	0.02908			1.2 v.s. 1.8	0.006			1.2 v.s. 1.8	0.02157			1.2 v.s. 1.8	0.3501
	1.2 v.s. 2.3	0.8189			1.2 v.s. 2.3	0.8505			1.2 v.s. 2.3	0.001303			1.2 v.s. 2.3	0.3583
	1.8 v.s. 2.3	0.0209			1.8 v.s. 2.3	0.03046			1.8 v.s. 2.3	0.2794			1.8 v.s. 2.3	0.9976
PE (p = 0.041)	0.6 v.s. 1.2	0.09696		Mg/Ca (p = 0.034)	0.6 v.s. 1.2	0.7753		Mg/Ca (p = 0.00355)	0.6 v.s. 1.2	0.003147		Mg/Ca (p = 0.0361)	0.6 v.s. 1.2	0.9942
	0.6 v.s. 1.8	0.9867			0.6 v.s. 1.8	0.3072			0.6 v.s. 1.8	0.04925			0.6 v.s. 1.8	0.9957
	0.6 v.s. 2.3	0.3381			0.6 v.s. 2.3	0.0247			0.6 v.s. 2.3	0.5394			0.6 v.s. 2.3	0.06859
	1.2 v.s. 1.8	0.05896			1.2 v.s. 1.8	0.8468			1.2 v.s. 1.8	0.2518			1.2 v.s. 1.8	0.9702
	1.2 v.s. 2.3	0.9547			1.2 v.s. 2.3	0.1883			1.2 v.s. 2.3	0.02128			1.2 v.s. 2.3	0.1119
	1.8 v.s. 2.3	0.2321			1.8 v.s. 2.3	0.5884			1.8 v.s. 2.3	0.3762			1.8 v.s. 2.3	0.07727
				PC (p = 0.0347)	0.6 v.s. 1.2	0.3731		Fe/Ca (p = 0.0379)	0.6 v.s. 1.2	0.181
					0.6 v.s. 1.8	0.07823			0.6 v.s. 1.8	0.9997
**This utilizes the Tukey Multiple Comparisons of Means test with 95% family-wise confidence level. After adjusting for multiple comparisons, some tests no longer have a significant p-value but are still close to having significance					0.6 v.s. 2.3	0.9995			0.6 v.s. 2.3	0.6586
					1.2 v.s. 1.8	0.3047			1.2 v.s. 1.8	0.1346
					1.2 v.s. 2.3	0.2312			1.2 v.s. 2.3	0.02382
					1.8 v.s. 2.3	0.0336			1.8 v.s. 2.3	0.6741
								Li/Mg (p = 0.011)	0.6 v.s. 1.2	0.02576
									0.6 v.s. 1.8	0.8638
									0.6 v.s. 2.3	0.9979
									1.2 v.s. 1.8	0.04999
									1.2 v.s. 2.3	0.009444
									1.8 v.s. 2.3	0.6953

## Sheet: Table S6
Table S6: ANOVA testing geochemical and physiological data between complexes.
0.6 mol.m-2.d-1					1.2 mol.m-2.d-1					1.8 mol.m-2.d-1					2.3 mol.m-2.d-1
Parameters	F	P value	R²		Parameters	F	P value	R²		Parameters	F	P value	R²		Parameters	F	P value	R²
δ13Cinorganic * Species	3.883	0.0327	0.4542		δ13Cinorganic * Species	10.51	0.000879	0.708		δ13Cinorganic * Species	46.35	0.001	0.8968		δ13Cinorganic * Species	14.07	0.000124	0.7378
δ13Corganic * Species	17.73	0.000681	0.8692		δ13Corganic * Species	1.303	0.357	0.3945		δ13Corganic * Species	9.305	0.00645	0.674		δ13Corganic * Species	13.56	0.00167	0.8356
δ11B * Species	5.756	0.00796	0.5351		δ11B * Species	1.583	0.238	0.2533		δ11B * Species	9.342	0.000996	0.6514		δ11B * Species	6.213	0.0059	0.5541
δ18O * Species	0.417	0.744	0.08201		δ18O * Species	2.862	0.0745	0.3802		δ18O * Species	3.487	0.0405	0.3953		δ18O * Species	3.006	0.0635	0.3755
Li/Ca * Species	5.926	0.00892	0.5776		Li/Ca * Species	2.86	0.0967	0.488		Li/Ca * Species	7.114	0.00339	0.5873		Li/Ca * Species	6.389	0.00528	0.561
B/Ca * Species	6.33	0.00617	0.5756		B/Ca * Species	4.692	0.0241	0.5613		B/Ca * Species	11.66	0.000335	0.6998		B/Ca * Species	2.727	0.0785	0.3383
Mg/Ca * Species	3.403	0.0477	0.4217		Mg/Ca * Species	0.603	0.628	0.1532		Mg/Ca * Species	3.856	0.0315	0.4354		Mg/Ca * Species	14.31	8.57e-05	0.7286
Sr/Ca * Species	20.88	1.96e-05	0.8173		Sr/Ca * Species	0.649	0.6	0.1505		Sr/Ca * Species	3.732	0.0348	0.4274		Sr/Ca * Species	3.506	0.0399	0.3966
Ba/Ca * Species	1.918	0.173	0.2912		Ba/Ca * Species	7.054	0.00651	0.658		Ba/Ca * Species	15.82	6.48e-05	0.7599		Ba/Ca * Species	1.948	0.163	0.2676
U/Ca * Species	7.783	0.00268	0.6252		U/Ca * Species	7.783	0.00459	0.6798		U/Ca * Species	1.472	0.262	0.2274		U/Ca * Species	7.546	0.00229	0.5859
Mn/Ca * Species	3.2	0.0562	0.4068		Mn/Ca * Species	3.094	0.0716	0.4576		Mn/Ca * Species	2.161	0.135	0.3018		Mn/Ca * Species	7.293	0.00267	0.5776
Fe/Ca * Species	0.655	0.593	0.123		Fe/Ca * Species	3.62	0.0489	0.4968		Fe/Ca * Species	0.13	0.941	0.02534		Fe/Ca * Species	1.735	0.2	0.2454
Li/Mg * Species	1.651	0.226	0.2759		Li/Mg * Species	2.439	0.131	0.4484		Li/Mg * Species	3.734	0.0347	0.4275		Li/Mg * Species	3.138	0.0567	0.3856
Calcification	12.43	0.000743	0.7722		Calcification	1.161	0.365	0.225		Calcification	9.198	0.00107	0.6478		Calcification	7.425	0.00452	0.6499
Net_PS_ugO2_cm-2_h-1	1.639	0.256	0.3807		Net_PS_ugO2_cm-2_h-1	0.146	0.928	0.0807		Net_PS_ugO2_cm-2_h-1	2.216	0.204	0.5707		Net_PS_ugO2_cm-2_h-1	13.48	0.0027	0.8525
Fv_Fm	4.342	0.0217	0.4648		Fv_Fm	0.374	0.773	0.0742		Fv_Fm	1.132	0.366	0.1751		Fv_Fm	5.442	0.00983	0.5212
Dark_respiration_ugO2_cm-2_h-1	6.24	0.0217	0.7278		Dark_respiration_ugO2_cm-2_h-1	Variable does not have enough levels for ANOVA				Dark_respiration_ugO2_cm-2_h-1	Variable does not have enough levels for ANOVA				Dark_respiration_ugO2_cm-2_h-1	9.483	0.00733	0.8025
Dark_calc_ugCaCO3_cm-2_h-1	9.295	0.00774	0.7993		Dark_calc_ugCaCO3_cm-2_h-1	Variable does not have enough levels for ANOVA				Dark_calc_ugCaCO3_cm-2_h-1	Variable does not have enough levels for ANOVA				Dark_calc_ugCaCO3_cm-2_h-1	1.978	0.219	0.4972
Light_calc_ugCaCO3_cm-2_h-1	0.176	0.91	0.0699		Light_calc_ugCaCO3_cm-2_h-1	1.816	0.261	0.5214		Light_calc_ugCaCO3_cm-2_h-1	0.815	0.531	0.2896		Light_calc_ugCaCO3_cm-2_h-1	0.578	0.648	0.1985
Chl_a_mg_g-1	6.865	0.0509	0.7744		Chl_a_mg_g-1	5.048	0.0359	0.6839		Chl_a_mg_g-1	18.77	0.000559	0.8756		Chl_a_mg_g-1	28.96	0.000256	0.9254
PC_ug_g-1	2.552	0.194	0.6568		PC_ug_g-1	12.38	0.00346	0.8414		PC_ug_g-1	11.63	0.00275	0.8135		PC_ug_g-1	19.81	0.000848	0.8946
PE_ug_g-1	30.49	0.00324	0.9581		PE_ug_g-1	4.385	0.042	0.6218		PE_ug_g-1	8.042	0.00847	0.751		PE_ug_g-1	4.578	0.0447	0.6624
ETRmax	0.04	0.989	0.01672		ETRmax	6.104	0.0399	0.7856		ETRmax	1.036	0.452	0.3834		ETRmax	5.765	0.0336	0.7424
FWHM	2.524	0.123	0.4569		FWHM	0.806	0.522	0.2117		FWHM	2.957	0.0843	0.4701		FWHM	0.624	0.63	0.2724
Legend
	Close to <0.05
	<0.05

## Sheet: Table S7
Table S7: T-test for parameters presenting significant ANOVA when testing for differences between complexes.
0.6 mol.m-2.d-1				1.2 mol.m-2.d-1				1.8 mol.m-2.d-1				2.3 mol.m-2.d-1
Parameters		p-value		Parameters		p-value		Parameters		p-value		Parameters		p-value
δ13Cinorganic (p = 0.0327)	Corallina/Arthrocardia "robust" vs Corallina/Arthrocardia "fine"	0.9839		δ13Cinorganic (p = 0.000879)	Corallina/Arthrocardia "robust" vs Corallina/Arthrocardia "fine"	0.8095		δ13Cinorganic (p = 4.09e-08)	Corallina/Arthrocardia "robust" vs Corallina/Arthrocardia "fine"	0.02307		δ13Cinorganic (p = 0.000124)	Corallina/Arthrocardia "robust" vs Corallina/Arthrocardia "fine"	0.1117
	Corallina/Arthrocardia "robust" vs Pneophyllum complex	0.03285			Corallina/Arthrocardia "robust" vs Pneophyllum complex	0.02273			Corallina/Arthrocardia "robust" vs Pneophyllum complex	1e-07			Corallina/Arthrocardia "robust" vs Pneophyllum complex	0.0006848
	Corallina/Arthrocardia "robust" vs Phymatolithopsis complex	0.5163			Corallina/Arthrocardia "robust" vs Phymatolithopsis complex	0.02557			Corallina/Arthrocardia "robust" vs Phymatolithopsis complex	9e-07			Corallina/Arthrocardia "robust" vs Phymatolithopsis complex	0.0002058
	Corallina/Arthrocardia "fine" vs Pneophyllum complex	0.0609			Corallina/Arthrocardia "fine" vs Pneophyllum complex	0.003229			Corallina/Arthrocardia "fine" vs Pneophyllum complex	1.4e-05			Corallina/Arthrocardia "fine" vs Pneophyllum complex	0.05926
	Corallina/Arthrocardia "fine" vs Phymatolithopsis complex	0.7125			Corallina/Arthrocardia "fine" vs Phymatolithopsis complex	0.00365			Corallina/Arthrocardia "fine" vs Phymatolithopsis complex	0.0002385			Corallina/Arthrocardia "fine" vs Phymatolithopsis complex	0.02252
	Pneophyllum complex vs Phymatolithopsis complex	0.3898			Pneophyllum complex vs Phymatolithopsis complex	0.9999			Pneophyllum complex vs Phymatolithopsis complex	0.4337			Pneophyllum complex vs Phymatolithopsis complex	0.9883
δ13Corganic (p = 0.000681)	Corallina/Arthrocardia "robust" vs Corallina/Arthrocardia "fine"	0.4		B/Ca (p = 0.0241)	Corallina/Arthrocardia "robust" vs Corallina/Arthrocardia "fine"	0.4646		δ13Corganic (p = 0.00645)	Corallina/Arthrocardia "robust" vs Corallina/Arthrocardia "fine"	-		δ13Corganic (p = 0.00167)	Corallina/Arthrocardia "robust" vs Corallina/Arthrocardia "fine"	0.9999
	Corallina/Arthrocardia "robust" vs Pneophyllum complex	0.01309			Corallina/Arthrocardia "robust" vs Pneophyllum complex	0.07641			Corallina/Arthrocardia "robust" vs Pneophyllum complex	-			Corallina/Arthrocardia "robust" vs Pneophyllum complex	0.008263
	Corallina/Arthrocardia "robust" vs Phymatolithopsis complex	0.0875			Corallina/Arthrocardia "robust" vs Phymatolithopsis complex	0.5823			Corallina/Arthrocardia "robust" vs Phymatolithopsis complex	-			Corallina/Arthrocardia "robust" vs Phymatolithopsis complex	0.1493
	Corallina/Arthrocardia "fine" vs Pneophyllum complex	0.0006746			Corallina/Arthrocardia "fine" vs Pneophyllum complex	0.4992			Corallina/Arthrocardia "fine" vs Pneophyllum complex	0.07692			Corallina/Arthrocardia "fine" vs Pneophyllum complex	0.01145
	Corallina/Arthrocardia "fine" vs Phymatolithopsis complex	0.00465			Corallina/Arthrocardia "fine" vs Phymatolithopsis complex	0.1264			Corallina/Arthrocardia "fine" vs Phymatolithopsis complex	0.7935			Corallina/Arthrocardia "fine" vs Phymatolithopsis complex	0.1793
	Pneophyllum complex vs Phymatolithopsis complex	0.5397			Pneophyllum complex vs Phymatolithopsis complex	0.02637			Pneophyllum complex vs Phymatolithopsis complex	0.005903			Pneophyllum complex vs Phymatolithopsis complex	0.001019
δ11B (p = 0.00796)	Corallina/Arthrocardia "robust" vs Corallina/Arthrocardia "fine"	0.554		Ba/Ca (p = 0.00651)	Corallina/Arthrocardia "robust" vs Corallina/Arthrocardia "fine"	0.7337		δ11B (p = 0.000996)	Corallina/Arthrocardia "robust" vs Corallina/Arthrocardia "fine"	0.4326		δ11B (p = 0.0059)	Corallina/Arthrocardia "robust" vs Corallina/Arthrocardia "fine"	0.9999
	Corallina/Arthrocardia "robust" vs Pneophyllum complex	0.07702			Corallina/Arthrocardia "robust" vs Pneophyllum complex	0.2708			Corallina/Arthrocardia "robust" vs Pneophyllum complex	0.02678			Corallina/Arthrocardia "robust" vs Pneophyllum complex	0.02967
	Corallina/Arthrocardia "robust" vs Phymatolithopsis complex	0.529			Corallina/Arthrocardia "robust" vs Phymatolithopsis complex	0.004426			Corallina/Arthrocardia "robust" vs Phymatolithopsis complex	0.4176			Corallina/Arthrocardia "robust" vs Phymatolithopsis complex	0.03996
	Corallina/Arthrocardia "fine" vs Pneophyllum complex	0.006783			Corallina/Arthrocardia "fine" vs Pneophyllum complex	0.7335			Corallina/Arthrocardia "fine" vs Pneophyllum complex	0.000739			Corallina/Arthrocardia "fine" vs Pneophyllum complex	0.03281
	Corallina/Arthrocardia "fine" vs Phymatolithopsis complex	0.06756			Corallina/Arthrocardia "fine" vs Phymatolithopsis complex	0.01595			Corallina/Arthrocardia "fine" vs Phymatolithopsis complex	0.02141			Corallina/Arthrocardia "fine" vs Phymatolithopsis complex	0.04456
	Pneophyllum complex vs Phymatolithopsis complex	0.5497			Pneophyllum complex vs Phymatolithopsis complex	0.1049			Pneophyllum complex vs Phymatolithopsis complex	0.3449			Pneophyllum complex vs Phymatolithopsis complex	0.9872
Li/Ca (p = 0.00892)	Corallina/Arthrocardia "robust" vs Corallina/Arthrocardia "fine"	0.4519		U/Ca (p = 0.00459)	Corallina/Arthrocardia "robust" vs Corallina/Arthrocardia "fine"	0.6371		δ18O/16O (p = 0.0405)	Corallina/Arthrocardia "robust" vs Corallina/Arthrocardia "fine"	0.9797		Li/Ca (p = 0.00528)	Corallina/Arthrocardia "robust" vs Corallina/Arthrocardia "fine"	0.9999
	Corallina/Arthrocardia "robust" vs Pneophyllum complex	0.01126			Corallina/Arthrocardia "robust" vs Pneophyllum complex	0.4194			Corallina/Arthrocardia "robust" vs Pneophyllum complex	0.1988			Corallina/Arthrocardia "robust" vs Pneophyllum complex	0.01185
	Corallina/Arthrocardia "robust" vs Phymatolithopsis complex	0.03666			Corallina/Arthrocardia "robust" vs Phymatolithopsis complex	0.01725			Corallina/Arthrocardia "robust" vs Phymatolithopsis complex	0.7887			Corallina/Arthrocardia "robust" vs Phymatolithopsis complex	0.1825
	Corallina/Arthrocardia "fine" vs Pneophyllum complex	0.1441			Corallina/Arthrocardia "fine" vs Pneophyllum complex	0.09197			Corallina/Arthrocardia "fine" vs Pneophyllum complex	0.1026			Corallina/Arthrocardia "fine" vs Pneophyllum complex	0.01117
	Corallina/Arthrocardia "fine" vs Phymatolithopsis complex	0.3219			Corallina/Arthrocardia "fine" vs Phymatolithopsis complex	0.003888			Corallina/Arthrocardia "fine" vs Phymatolithopsis complex	0.9465			Corallina/Arthrocardia "fine" vs Phymatolithopsis complex	0.1742
	Pneophyllum complex vs Phymatolithopsis complex	0.9873			Pneophyllum complex vs Phymatolithopsis complex	0.2236			Pneophyllum complex vs Phymatolithopsis complex	0.03677			Pneophyllum complex vs Phymatolithopsis complex	0.5946
B/Ca (p = 0.00617)	Corallina/Arthrocardia "robust" vs Corallina/Arthrocardia "fine"	0.8075		Fe/Ca (p = 0.0489)	Corallina/Arthrocardia "robust" vs Corallina/Arthrocardia "fine"	0.7967		Li/Ca (p = 0.00339)	Corallina/Arthrocardia "robust" vs Corallina/Arthrocardia "fine"	0.4324		Mg/Ca (p =8.57e-05)	Corallina/Arthrocardia "robust" vs Corallina/Arthrocardia "fine"	0.09576
	Corallina/Arthrocardia "robust" vs Pneophyllum complex	0.6962			Corallina/Arthrocardia "robust" vs Pneophyllum complex	0.855			Corallina/Arthrocardia "robust" vs Pneophyllum complex	0.01896			Corallina/Arthrocardia "robust" vs Pneophyllum complex	0.00557
	Corallina/Arthrocardia "robust" vs Phymatolithopsis complex	0.04787			Corallina/Arthrocardia "robust" vs Phymatolithopsis complex	0.081			Corallina/Arthrocardia "robust" vs Phymatolithopsis complex	0.003359			Corallina/Arthrocardia "robust" vs Phymatolithopsis complex	0.9999
	Corallina/Arthrocardia "fine" vs Pneophyllum complex	0.994			Corallina/Arthrocardia "fine" vs Pneophyllum complex	0.4228			Corallina/Arthrocardia "fine" vs Pneophyllum complex	0.3875			Corallina/Arthrocardia "fine" vs Pneophyllum complex	4.16e-05
	Corallina/Arthrocardia "fine" vs Phymatolithopsis complex	0.009785			Corallina/Arthrocardia "fine" vs Phymatolithopsis complex	0.2372			Corallina/Arthrocardia "fine" vs Phymatolithopsis complex	0.106			Corallina/Arthrocardia "fine" vs Phymatolithopsis complex	0.09727
	Pneophyllum complex vs Phymatolithopsis complex	0.008938			Pneophyllum complex vs Phymatolithopsis complex	0.04115			Pneophyllum complex vs Phymatolithopsis complex	0.8147			Pneophyllum complex vs Phymatolithopsis complex	0.005473
Mg/Ca (p = 0.0477)	Corallina/Arthrocardia "robust" vs Corallina/Arthrocardia "fine"	0.4974		Chl a (p = 0.0359)	Corallina/Arthrocardia "robust" vs Corallina/Arthrocardia "fine"	0.9728		B/Ca (p = 0.000335)	Corallina/Arthrocardia "robust" vs Corallina/Arthrocardia "fine"	0.5774		Sr/Ca (p = 0.0399)	Corallina/Arthrocardia "robust" vs Corallina/Arthrocardia "fine"	0.5843
	Corallina/Arthrocardia "robust" vs Pneophyllum complex	0.03861			Corallina/Arthrocardia "robust" vs Pneophyllum complex	0.1278			Corallina/Arthrocardia "robust" vs Pneophyllum complex	0.1965			Corallina/Arthrocardia "robust" vs Pneophyllum complex	0.9237
	Corallina/Arthrocardia "robust" vs Phymatolithopsis complex	0.1801			Corallina/Arthrocardia "robust" vs Phymatolithopsis complex	0.3869			Corallina/Arthrocardia "robust" vs Phymatolithopsis complex	0.0111			Corallina/Arthrocardia "robust" vs Phymatolithopsis complex	0.3115
	Corallina/Arthrocardia "fine" vs Pneophyllum complex	0.3646			Corallina/Arthrocardia "fine" vs Pneophyllum complex	0.361			Corallina/Arthrocardia "fine" vs Pneophyllum complex	0.023325			Corallina/Arthrocardia "fine" vs Pneophyllum complex	0.9089
	Corallina/Arthrocardia "fine" vs Phymatolithopsis complex	0.8479			Corallina/Arthrocardia "fine" vs Phymatolithopsis complex	0.3298			Corallina/Arthrocardia "fine" vs Phymatolithopsis complex	0.1818			Corallina/Arthrocardia "fine" vs Phymatolithopsis complex	0.03263
	Pneophyllum complex vs Phymatolithopsis complex	0.8378			Pneophyllum complex vs Phymatolithopsis complex	0.02724			Pneophyllum complex vs Phymatolithopsis complex	0.0001966			Pneophyllum complex vs Phymatolithopsis complex	0.1139
Sr/Ca (p = 1.96e-05)	Corallina/Arthrocardia "robust" vs Corallina/Arthrocardia "fine"	0.2179		PC (p = 0.00346)	Corallina/Arthrocardia "robust" vs Corallina/Arthrocardia "fine"	0.9999		Mg/Ca (p = 0.0315)	Corallina/Arthrocardia "robust" vs Corallina/Arthrocardia "fine"	0.7816		U/Ca (p = 0.00229)	Corallina/Arthrocardia "robust" vs Corallina/Arthrocardia "fine"	0.6778
	Corallina/Arthrocardia "robust" vs Pneophyllum complex	0.02288			Corallina/Arthrocardia "robust" vs Pneophyllum complex	0.02614			Corallina/Arthrocardia "robust" vs Pneophyllum complex	0.05658			Corallina/Arthrocardia "robust" vs Pneophyllum complex	0.004267
	Corallina/Arthrocardia "robust" vs Phymatolithopsis complex	0.0006356			Corallina/Arthrocardia "robust" vs Phymatolithopsis complex	0.08215			Corallina/Arthrocardia "robust" vs Phymatolithopsis complex	0.05593			Corallina/Arthrocardia "robust" vs Phymatolithopsis complex	0.0134
	Corallina/Arthrocardia "fine" vs Pneophyllum complex	0.0006223			Corallina/Arthrocardia "fine" vs Pneophyllum complex	0.06114			Corallina/Arthrocardia "fine" vs Pneophyllum complex	0.3528			Corallina/Arthrocardia "fine" vs Pneophyllum complex	0.04123
	Corallina/Arthrocardia "fine" vs Phymatolithopsis complex	2.53e-05			Corallina/Arthrocardia "fine" vs Phymatolithopsis complex	0.1308			Corallina/Arthrocardia "fine" vs Phymatolithopsis complex	0.35			Corallina/Arthrocardia "fine" vs Phymatolithopsis complex	0.1176
	Pneophyllum complex vs Phymatolithopsis complex	0.3052			Pneophyllum complex vs Phymatolithopsis complex	0.002384			Pneophyllum complex vs Phymatolithopsis complex	0.9999			Pneophyllum complex vs Phymatolithopsis complex	0.9416
U/Ca (p = 0.00268)	Corallina/Arthrocardia "robust" vs Corallina/Arthrocardia "fine"	0.99993		PE (p = 0.042)	Corallina/Arthrocardia "robust" vs Corallina/Arthrocardia "fine"	0.1606		Sr/Ca (p = 0.0348)	Corallina/Arthrocardia "robust" vs Corallina/Arthrocardia "fine"	0.9999		Mn/Ca (p = 0.00267)	Corallina/Arthrocardia "robust" vs Corallina/Arthrocardia "fine"	0.9957
	Corallina/Arthrocardia "robust" vs Pneophyllum complex	0.1199			Corallina/Arthrocardia "robust" vs Pneophyllum complex	0.6609			Corallina/Arthrocardia "robust" vs Pneophyllum complex	0.7462			Corallina/Arthrocardia "robust" vs Pneophyllum complex	0.007451
	Corallina/Arthrocardia "robust" vs Phymatolithopsis complex	0.00616			Corallina/Arthrocardia "robust" vs Phymatolithopsis complex	0.492			Corallina/Arthrocardia "robust" vs Phymatolithopsis complex	0.1626			Corallina/Arthrocardia "robust" vs Phymatolithopsis complex	0.193
	Corallina/Arthrocardia "fine" vs Pneophyllum complex	0.10939			Corallina/Arthrocardia "fine" vs Pneophyllum complex	0.04286			Corallina/Arthrocardia "fine" vs Pneophyllum complex	0.80895			Corallina/Arthrocardia "fine" vs Pneophyllum complex	0.004699
	Corallina/Arthrocardia "fine" vs Phymatolithopsis complex	0.005565			Corallina/Arthrocardia "fine" vs Phymatolithopsis complex	0.9344			Corallina/Arthrocardia "fine" vs Phymatolithopsis complex	0.1816			Corallina/Arthrocardia "fine" vs Phymatolithopsis complex	0.1318
	Pneophyllum complex vs Phymatolithopsis complex	0.4513			Pneophyllum complex vs Phymatolithopsis complex	0.1589			Pneophyllum complex vs Phymatolithopsis complex	0.02575			Pneophyllum complex vs Phymatolithopsis complex	0.3511
Calcification (p = 0.000743)	Corallina/Arthrocardia "robust" vs Corallina/Arthrocardia "fine"	0.247		ETRmax (p = 0.0399)	Corallina/Arthrocardia "robust" vs Corallina/Arthrocardia "fine"	0.2719		Ba/Ca (p = 6.48e-05)	Corallina/Arthrocardia "robust" vs Corallina/Arthrocardia "fine"	0.1978		Calcification (p = 0.00452)	Corallina/Arthrocardia "robust" vs Corallina/Arthrocardia "fine"	0.8802
	Corallina/Arthrocardia "robust" vs Pneophyllum complex	0.1546			Corallina/Arthrocardia "robust" vs Pneophyllum complex	0.752			Corallina/Arthrocardia "robust" vs Pneophyllum complex	0.007511			Corallina/Arthrocardia "robust" vs Pneophyllum complex	0.04871
	Corallina/Arthrocardia "robust" vs Phymatolithopsis complex	0.0003925			Corallina/Arthrocardia "robust" vs Phymatolithopsis complex	0.03182			Corallina/Arthrocardia "robust" vs Phymatolithopsis complex	3.74e-05			Corallina/Arthrocardia "robust" vs Phymatolithopsis complex	0.0387
	Corallina/Arthrocardia "fine" vs Pneophyllum complex	0.9918			Corallina/Arthrocardia "fine" vs Pneophyllum complex	0.7621			Corallina/Arthrocardia "fine" vs Pneophyllum complex	0.4405			Corallina/Arthrocardia "fine" vs Pneophyllum complex	0.01976
	Corallina/Arthrocardia "fine" vs Phymatolithopsis complex	0.02461			Corallina/Arthrocardia "fine" vs Phymatolithopsis complex	0.3386			Corallina/Arthrocardia "fine" vs Phymatolithopsis complex	0.003648			Corallina/Arthrocardia "fine" vs Phymatolithopsis complex	0.01505
	Pneophyllum complex vs Phymatolithopsis complex	0.04073			Pneophyllum complex vs Phymatolithopsis complex	0.1159			Pneophyllum complex vs Phymatolithopsis complex	0.05306			Pneophyllum complex vs Phymatolithopsis complex	0.9994
Fv_Fm (p = 0.0217)	Corallina/Arthrocardia "robust" vs Corallina/Arthrocardia "fine"	0.9687						Li/Mg (p = 0.0347)	Corallina/Arthrocardia "robust" vs Corallina/Arthrocardia "fine"	0.3362		Net PS (p = 0.0027)	Corallina/Arthrocardia "robust" vs Corallina/Arthrocardia "fine"	0.1399
	Corallina/Arthrocardia "robust" vs Pneophyllum complex	0.9839							Corallina/Arthrocardia "robust" vs Pneophyllum complex	0.1029			Corallina/Arthrocardia "robust" vs Pneophyllum complex	0.07176
	Corallina/Arthrocardia "robust" vs Phymatolithopsis complex	0.05318							Corallina/Arthrocardia "robust" vs Phymatolithopsis complex	0.0282			Corallina/Arthrocardia "robust" vs Phymatolithopsis complex	0.04719
	Corallina/Arthrocardia "fine" vs Pneophyllum complex	0.8623							Corallina/Arthrocardia "fine" vs Pneophyllum complex	0.9306			Corallina/Arthrocardia "fine" vs Pneophyllum complex	0.005095
	Corallina/Arthrocardia "fine" vs Phymatolithopsis complex	0.02254							Corallina/Arthrocardia "fine" vs Phymatolithopsis complex	0.6032			Corallina/Arthrocardia "fine" vs Phymatolithopsis complex	0.003762
	Pneophyllum complex vs Phymatolithopsis complex	0.1352							Pneophyllum complex vs Phymatolithopsis complex	0.8971			Pneophyllum complex vs Phymatolithopsis complex	0.9874
Dark Respiration (p = 0.0217)	Corallina/Arthrocardia "robust" vs Corallina/Arthrocardia "fine"	0.9774						Calcification (p = 0.00107)	Corallina/Arthrocardia "robust" vs Corallina/Arthrocardia "fine"	0.2488		Fv_Fm (p = 0.00983)	Corallina/Arthrocardia "robust" vs Corallina/Arthrocardia "fine"	0.5085
	Corallina/Arthrocardia "robust" vs Pneophyllum complex	0.04994							Corallina/Arthrocardia "robust" vs Pneophyllum complex	0.0274			Corallina/Arthrocardia "robust" vs Pneophyllum complex	0.9822
	Corallina/Arthrocardia "robust" vs Phymatolithopsis complex	0.1057							Corallina/Arthrocardia "robust" vs Phymatolithopsis complex	0.0007081			Corallina/Arthrocardia "robust" vs Phymatolithopsis complex	0.103
	Corallina/Arthrocardia "fine" vs Pneophyllum complex	0.0519							Corallina/Arthrocardia "fine" vs Pneophyllum complex	0.5434			Corallina/Arthrocardia "fine" vs Pneophyllum complex	0.7698
	Corallina/Arthrocardia "fine" vs Phymatolithopsis complex	0.1261							Corallina/Arthrocardia "fine" vs Phymatolithopsis complex	0.03171			Corallina/Arthrocardia "fine" vs Phymatolithopsis complex	0.006878
	Pneophyllum complex vs Phymatolithopsis complex	0.9987							Pneophyllum complex vs Phymatolithopsis complex	0.415			Pneophyllum complex vs Phymatolithopsis complex	0.0684
Dark Calc (p = 0.00774)	Corallina/Arthrocardia "robust" vs Corallina/Arthrocardia "fine"	0.01532						Chl a (p = 0.000559)	Corallina/Arthrocardia "robust" vs Corallina/Arthrocardia "fine"	0.9745		Dark Respiration (p = 0.00733)	Corallina/Arthrocardia "robust" vs Corallina/Arthrocardia "fine"	0.8886
	Corallina/Arthrocardia "robust" vs Pneophyllum complex	0.006787							Corallina/Arthrocardia "robust" vs Pneophyllum complex	0.05737			Corallina/Arthrocardia "robust" vs Pneophyllum complex	0.03351
	Corallina/Arthrocardia "robust" vs Phymatolithopsis complex	0.02337							Corallina/Arthrocardia "robust" vs Phymatolithopsis complex	0.0103			Corallina/Arthrocardia "robust" vs Phymatolithopsis complex	0.03549
	Corallina/Arthrocardia "fine" vs Pneophyllum complex	0.9999							Corallina/Arthrocardia "fine" vs Pneophyllum complex	0.1874			Corallina/Arthrocardia "fine" vs Pneophyllum complex	0.02218
	Corallina/Arthrocardia "fine" vs Phymatolithopsis complex	0.8718							Corallina/Arthrocardia "fine" vs Phymatolithopsis complex	0.01033			Corallina/Arthrocardia "fine" vs Phymatolithopsis complex	0.02331
	Pneophyllum complex vs Phymatolithopsis complex	0.7747							Pneophyllum complex vs Phymatolithopsis complex	0.0003264			Pneophyllum complex vs Phymatolithopsis complex	0.9999
PE (p = 0.00324)	Corallina/Arthrocardia "robust" vs Corallina/Arthrocardia "fine"	0.4437						PC (p = 0.00275)	Corallina/Arthrocardia "robust" vs Corallina/Arthrocardia "fine"	0.4272		Chl a (p = 0.000256)	Corallina/Arthrocardia "robust" vs Corallina/Arthrocardia "fine"	0.2861
	Corallina/Arthrocardia "robust" vs Pneophyllum complex	0.004059							Corallina/Arthrocardia "robust" vs Pneophyllum complex	0.9846			Corallina/Arthrocardia "robust" vs Pneophyllum complex	0.03614
	Corallina/Arthrocardia "robust" vs Phymatolithopsis complex	0.498							Corallina/Arthrocardia "robust" vs Phymatolithopsis complex	0.005407			Corallina/Arthrocardia "robust" vs Phymatolithopsis complex	0.01439
	Corallina/Arthrocardia "fine" vs Pneophyllum complex	0.04576							Corallina/Arthrocardia "fine" vs Pneophyllum complex	0.2459			Corallina/Arthrocardia "fine" vs Pneophyllum complex	0.3518
	Corallina/Arthrocardia "fine" vs Phymatolithopsis complex	0.1793							Corallina/Arthrocardia "fine" vs Phymatolithopsis complex	0.0682			Corallina/Arthrocardia "fine" vs Phymatolithopsis complex	0.0009076
	Pneophyllum complex vs Phymatolithopsis complex	0.006216							Pneophyllum complex vs Phymatolithopsis complex	0.002227			Pneophyllum complex vs Phymatolithopsis complex	0.0002169
								PE (p = 0.00847)	Corallina/Arthrocardia "robust" vs Corallina/Arthrocardia "fine"	0.9999		PC (p = 0.000848)	Corallina/Arthrocardia "robust" vs Corallina/Arthrocardia "fine"	0.9999
									Corallina/Arthrocardia "robust" vs Pneophyllum complex	0.03273			Corallina/Arthrocardia "robust" vs Pneophyllum complex	0.03913
									Corallina/Arthrocardia "robust" vs Phymatolithopsis complex	0.7778			Corallina/Arthrocardia "robust" vs Phymatolithopsis complex	0.04495
									Corallina/Arthrocardia "fine" vs Pneophyllum complex	0.06024			Corallina/Arthrocardia "fine" vs Pneophyllum complex	0.02269
									Corallina/Arthrocardia "fine" vs Phymatolithopsis complex	0.8238			Corallina/Arthrocardia "fine" vs Phymatolithopsis complex	0.02783
									Pneophyllum complex vs Phymatolithopsis complex	0.01456			Pneophyllum complex vs Phymatolithopsis complex	0.0005065
												PE (p = 0.0447)	Corallina/Arthrocardia "robust" vs Corallina/Arthrocardia "fine"	0.8748
													Corallina/Arthrocardia "robust" vs Pneophyllum complex	0.6467
													Corallina/Arthrocardia "robust" vs Phymatolithopsis complex	0.2575
													Corallina/Arthrocardia "fine" vs Pneophyllum complex	0.2192
													Corallina/Arthrocardia "fine" vs Phymatolithopsis complex	0.509
													Pneophyllum complex vs Phymatolithopsis complex	0.03325
												ETRmax (p = 0.0336)	Corallina/Arthrocardia "robust" vs Corallina/Arthrocardia "fine"	0.2462
													Corallina/Arthrocardia "robust" vs Pneophyllum complex	0.9921
													Corallina/Arthrocardia "robust" vs Phymatolithopsis complex	0.2813
													Corallina/Arthrocardia "fine" vs Pneophyllum complex	0.1193
													Corallina/Arthrocardia "fine" vs Phymatolithopsis complex	0.02356
													Pneophyllum complex vs Phymatolithopsis complex	0.2694

## Sheet: Table S8
Table S8: δ11B of NIST 8301, JCp-1 and seawater measured in this study.
Standards	Measured δ11B (relative to NIST SRM boric acid standard 951)	Published δ11B values	References
NIST 8301 coral	24.26 ± 0.22 ‰ (2 SE, n=19)	24.17 ± 0.07 ‰ (2 SE, n=7)	Stewart et al., 2020
JCp-1	24.51 ± 0.14 ‰ (2 SE, n=12)	24.36 ± 0.14 ‰ (2 SE, n=10)	Gutjarh et al., 2021
Seawater	39.53 ± 0.12 ‰ (2 SE, n=2)	39.61 ± 0.04 ‰ (2 SE, n=28)	Foster et al., 2010
